# Supplementary material for: Bio-derived 3D TiO2 hollow spheres with a mesocrystal nanostructure to achieve improved electrochemical performance of Na-ion batteries in ether-based electrolytes
Source: Royal Society of Chemistry journal article supplement (doi:10.1039/c9ta00334g), 2019-01-01
Supplement: c9ta00334g1.pdf [file c9ta00334g1.pdf]

**Bio-derived 3D TiO<sub>2</sub> hollow spheres with mesocrystal  
nanostructure for achieving improved electrochemical  
performance of Na-Ion Batteries in ether-based electrolytes**

Rongrong Yang,<sup>†</sup> Lanju Sun,<sup>†</sup> Wei Liu,<sup>\*</sup> Yuan Zhang, Yongpeng Cui, Yongxiu Du,

Shuang Liu, Huanlei Wang and Minghua Huang

School of Materials Science and Engineering, Ocean University of China, Qingdao,

266100 China

\*Corresponding author. Tel.: +86 532 66781906. E-mail address: [weiliu@ouc.edu.cn](mailto:weiliu@ouc.edu.cn);

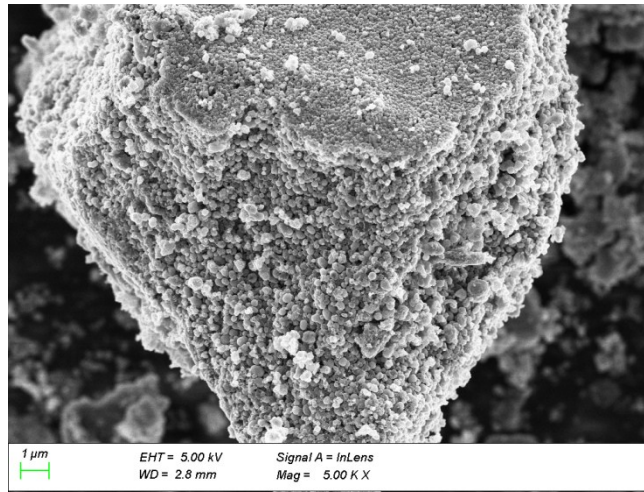

Figure S1. SEM image of the aggregated squid ink spheres.

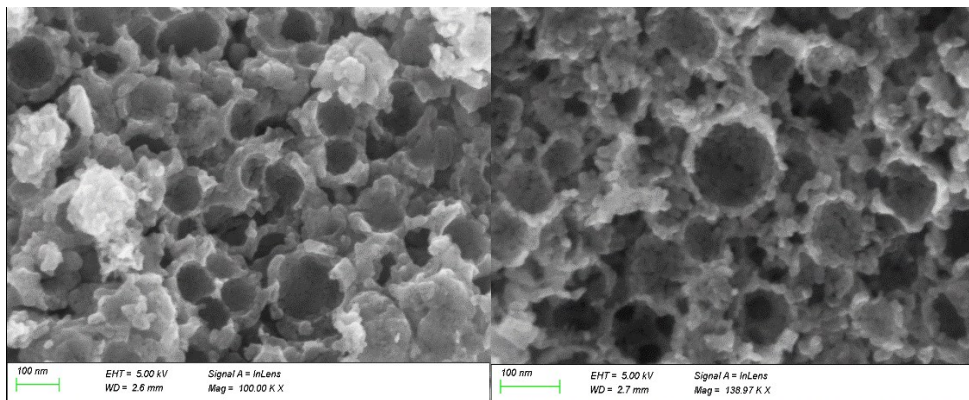

Figure S2. SEM images of TiO<sub>2</sub> spheres with hollow structure.

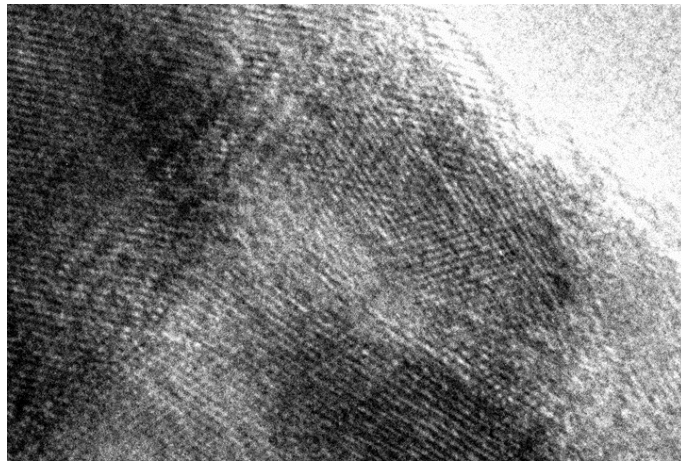

Figure S3. High-magnification TEM of the MTHP sample.

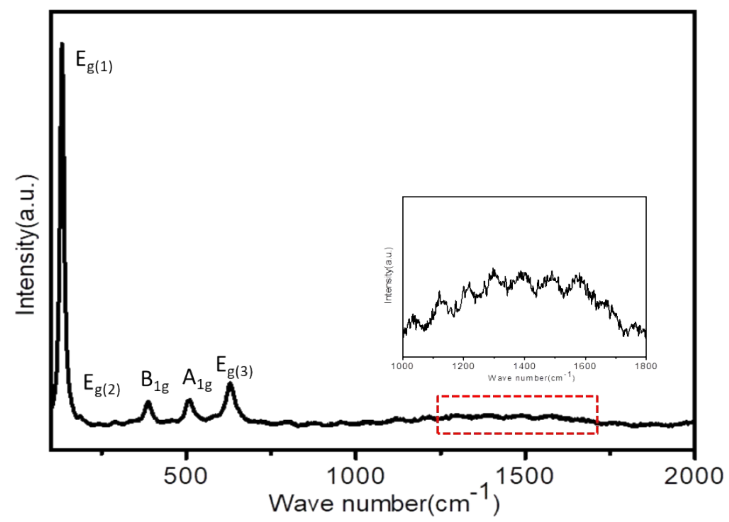

Figure S4. RM spectrum of the MTHP sample.

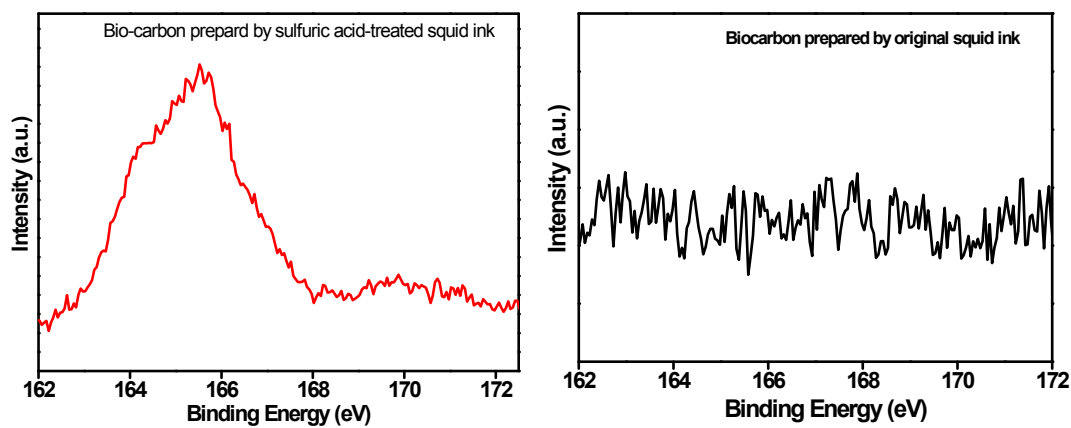

Figure S5. High-resolution S2p XPS spectra of biocarbon prepared by sulfuric acid treated squid ink and original ones.

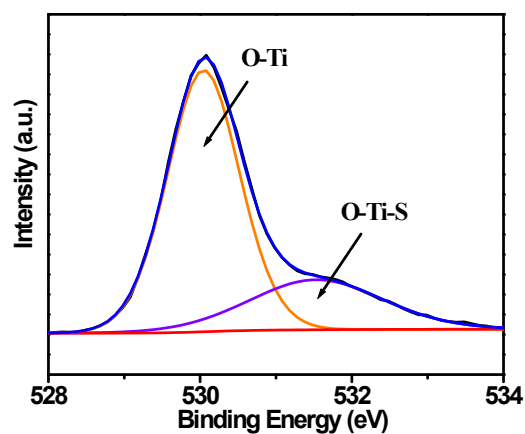

Figure S6. High-resolution O2p XPS spectra of MTHS-500.

Table S1. The comparison of sodium ion storage performance reported in recent literature

| samples                      | Capacity (mAh g <sup>-1</sup> ) |                           | ICE | Ref.         |
|------------------------------|---------------------------------|---------------------------|-----|--------------|
|                              | 50 mA g <sup>-1</sup>           | 1A g <sup>-1</sup>        |     |              |
| TiO <sub>2-x</sub> /NCFs     | 230 (50 mA g <sup>-1</sup> )    | 120 (1A g <sup>-1</sup> ) | 44% | 1            |
| R-TiO <sub>2</sub> -S        | 264 (50 mA g <sup>-1</sup> )    | 138 (2A g <sup>-1</sup> ) | 48% | 2            |
| A-TiO <sub>2</sub>           | 217(50 mA g <sup>-1</sup> )     | 142 (2A g <sup>-1</sup> ) | 56% | 3            |
| TiO <sub>2</sub> /C          | 277 (50 mA g <sup>-1</sup> )    | 163 (2A g <sup>-1</sup> ) | 48% | 4            |
| TiO <sub>2</sub> @RGO        | 248 (50 mA g <sup>-1</sup> )    | 118 (2A g <sup>-1</sup> ) | 60% | 5            |
| Free-carbon TiO <sub>2</sub> | 177 (50 mA g <sup>-1</sup> )    | 83 (1A g <sup>-1</sup> )  | 37% | 6            |
| MTHS-500                     | 255 (50 mA g <sup>-1</sup> )    | 142 (2A g <sup>-1</sup> ) | 59% | In this work |

#### References

1. Q. Zhao, R. Bi, J. Cui, X. Yang and L. Zhang, *ACS Appl. Energy Mater.* 2018, 1, 4459–4466.
2. H. He, D. Huang, W. Pang, D. Sun, Q. Wang, Y. Tang, X. Ji, Z. Guo, and H. Wang. *Adv. Mater.* 2018, **30**, 1801013.
3. Z. Xu, K. Lim, K. Park, G. Yoon, W. Seong and K. Kang, *Adv. Funct. Mater.* 2018, **28**, 1802099.
4. H. Hea, Q. Gana, H. Wang, G. Xu, X. Zhang, D. Huang, F. Fu, Y. Tang, K. Amine, M. Shao, *Nano Energy* 2018, **44**, 217 - 227.
5. Y. Liu, J. Liu, D. Bin, M. Hou, A. Tamirat, Y. Wang and Y. Xia, *ACS Appl. Mater. Interfaces* 2018, **10**, 14818–14826.
6. T. Chadha, P. Dutta, R. Raliya, S. Mitra and P. Biswas, *Sustainable Energy Fuels*, 2018, **2**, 1582–1587.
